# Supplementary material
Source: Springer Nature journal article supplement (https://www.springermedizin.de/resource/supplementary/13569_2013_45_MOESM2_ESM.pdf/9676708)

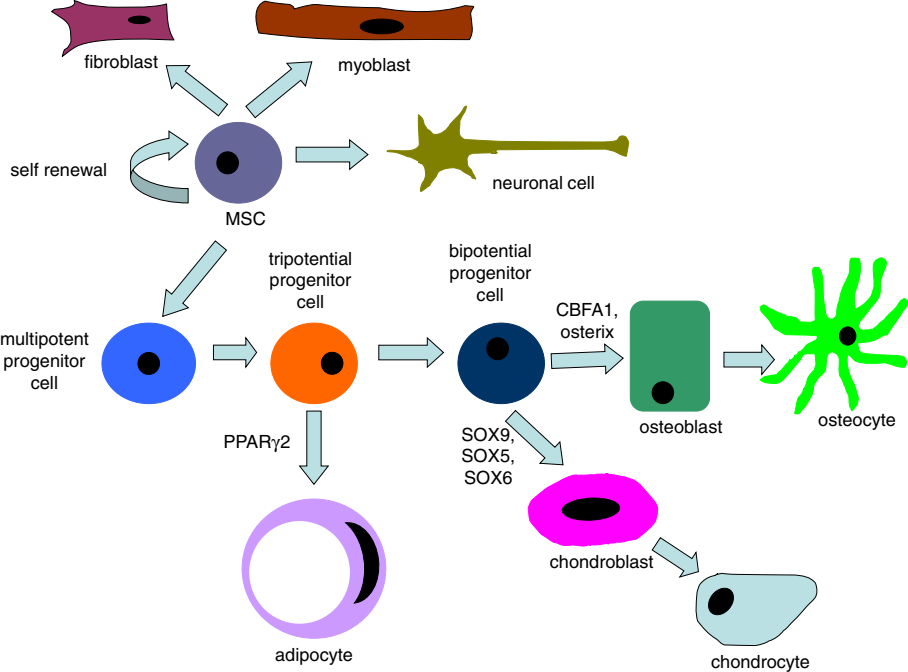

Supplement: MOESM2 [file 9676708]
